# Supplementary figures and images for: Development of plant-based biopolymer coatings for 3D cell culture: boron–silica-enriched quince seed mucilage nanocomposites
Source: Royal Society of Chemistry journal article supplement (doi:10.1039/d3bm00170a), 2023-01-01

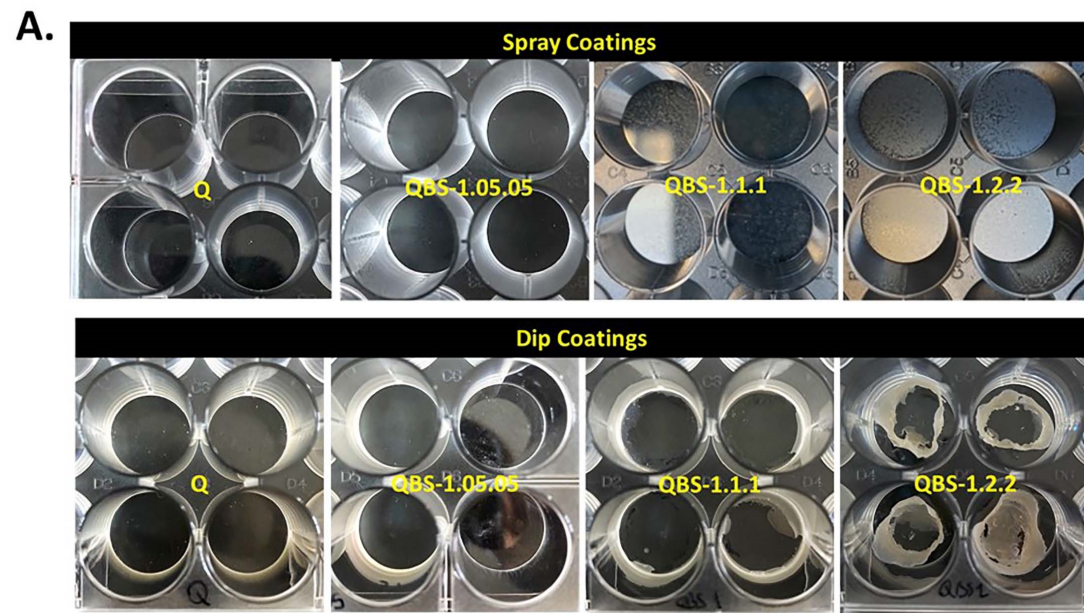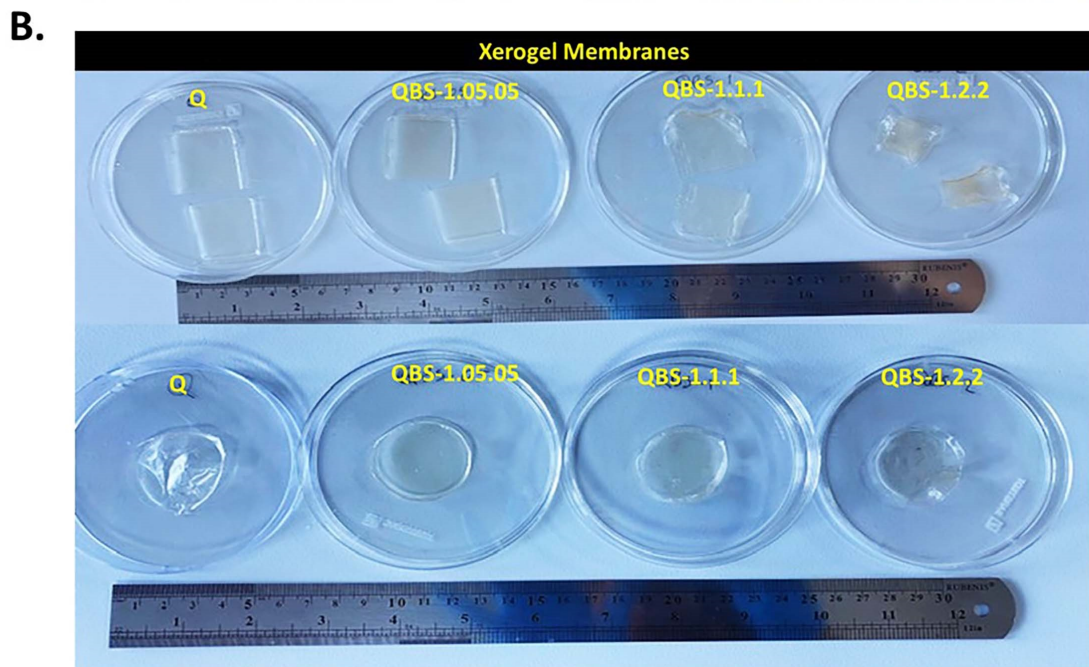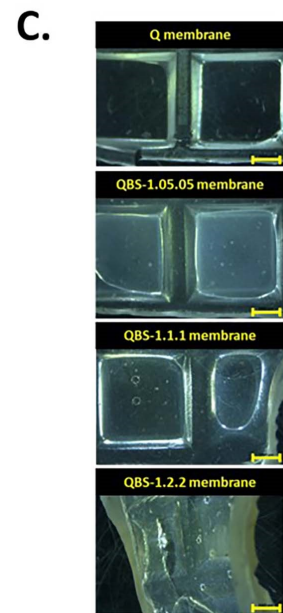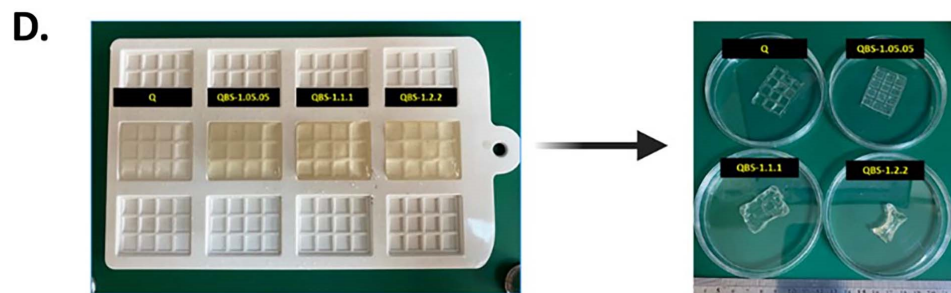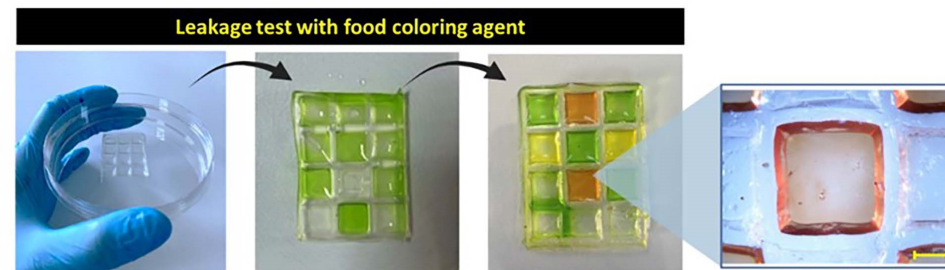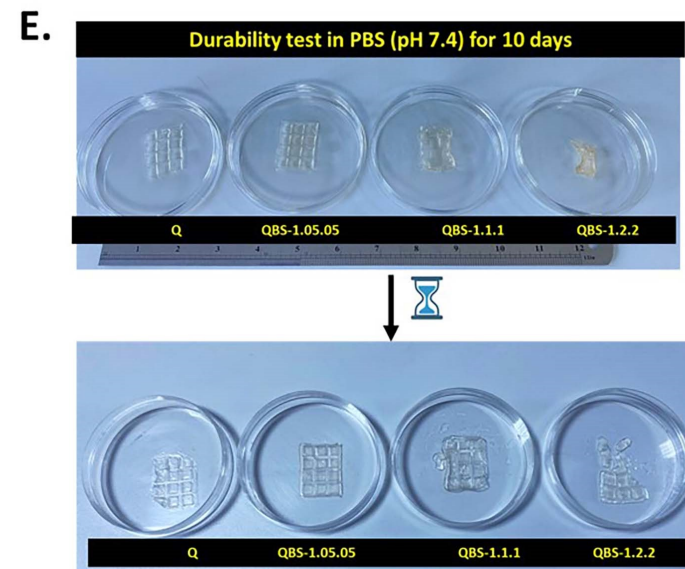

Supplement: d3bm00170a3.pdf [file d3bm00170a3.pdf]

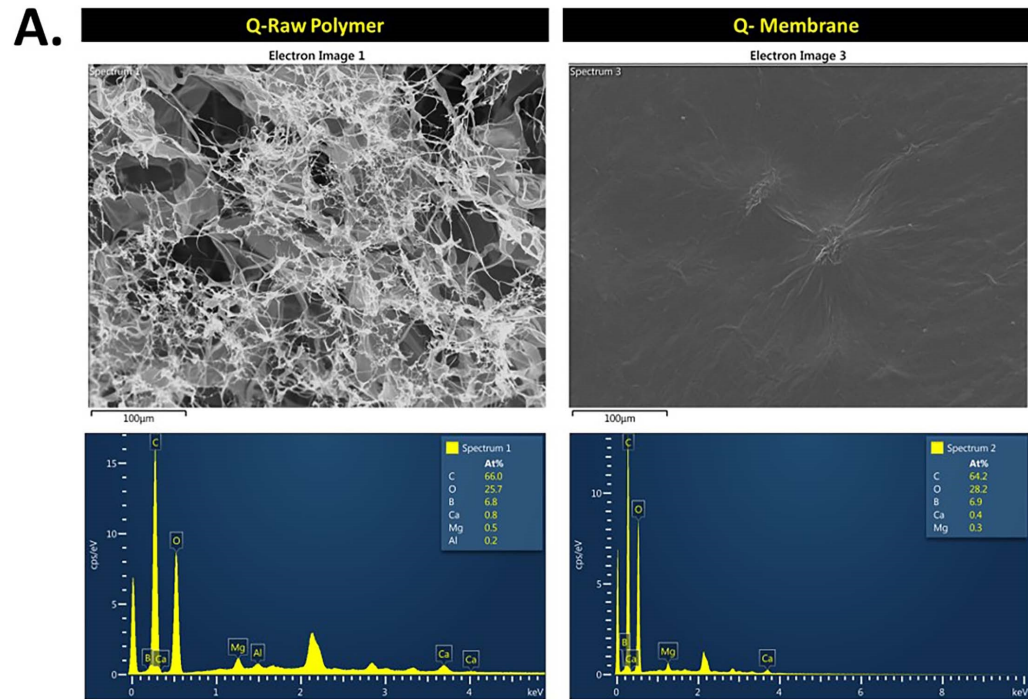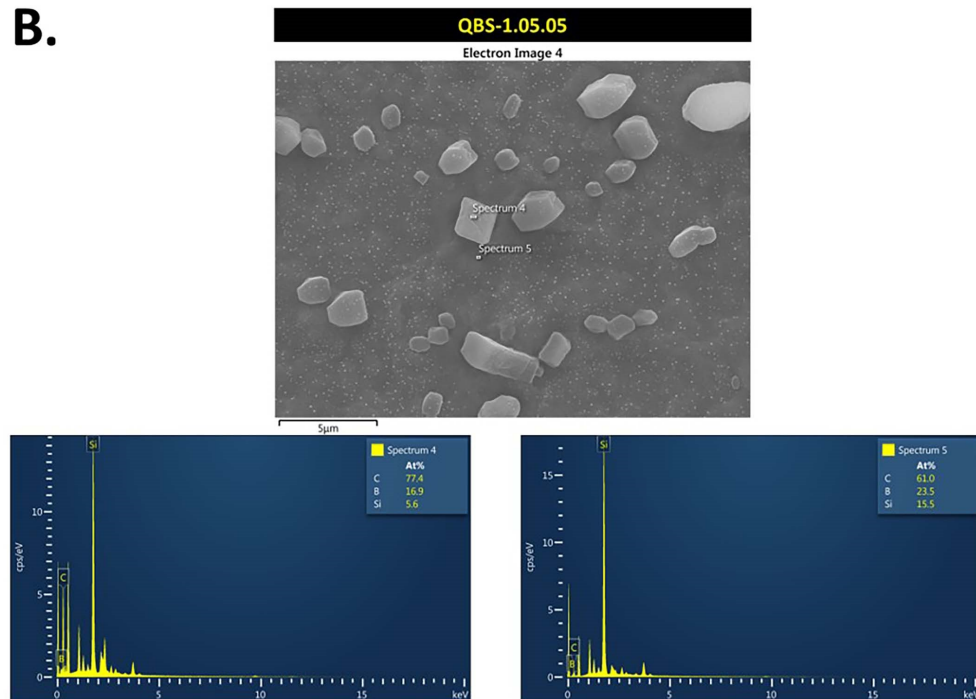

Supplement: d3bm00170a4.pdf [file d3bm00170a4.pdf]

## BSA Calibration Curve for BCA Assay

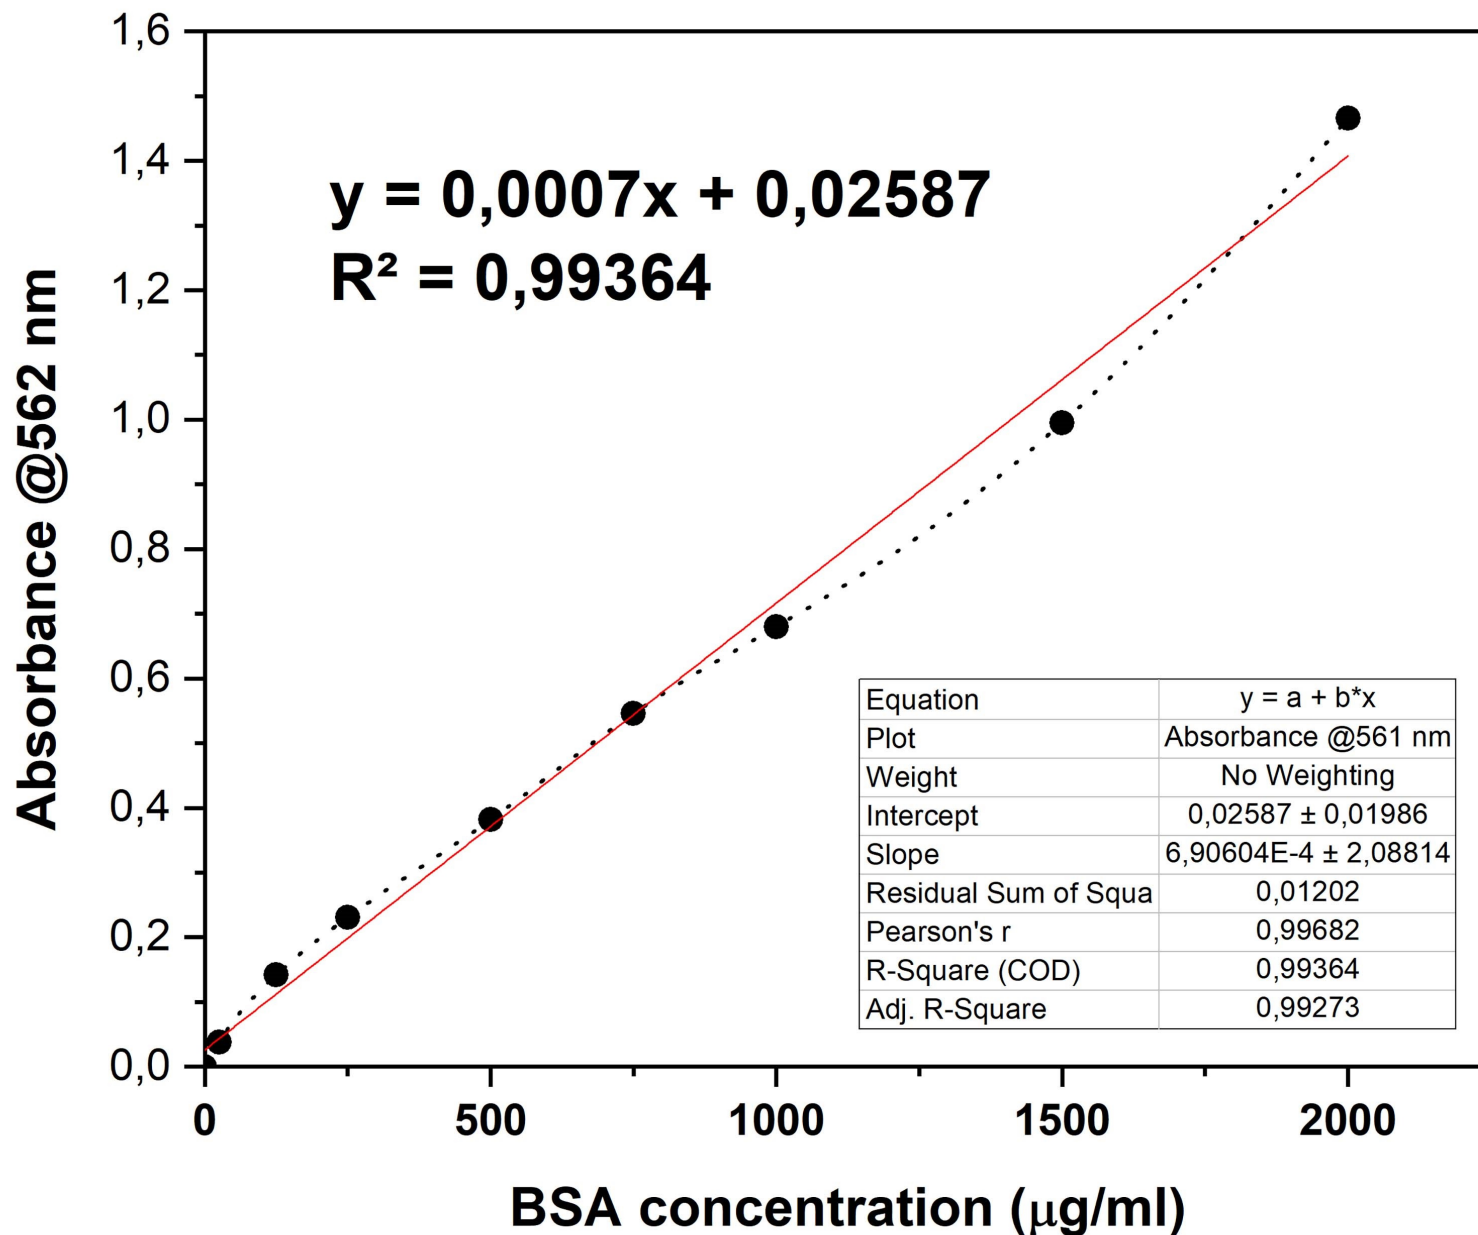

Supplement: d3bm00170a5.pdf [file d3bm00170a5.pdf]

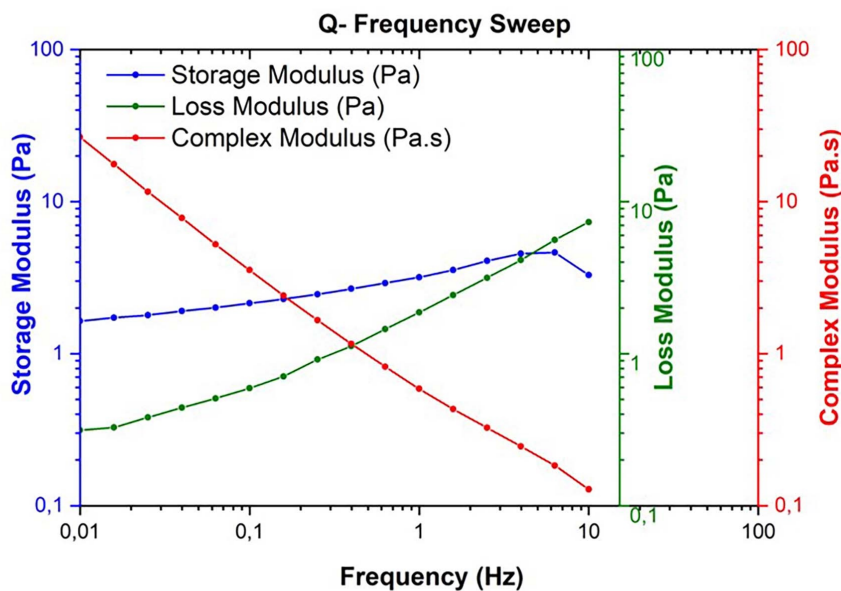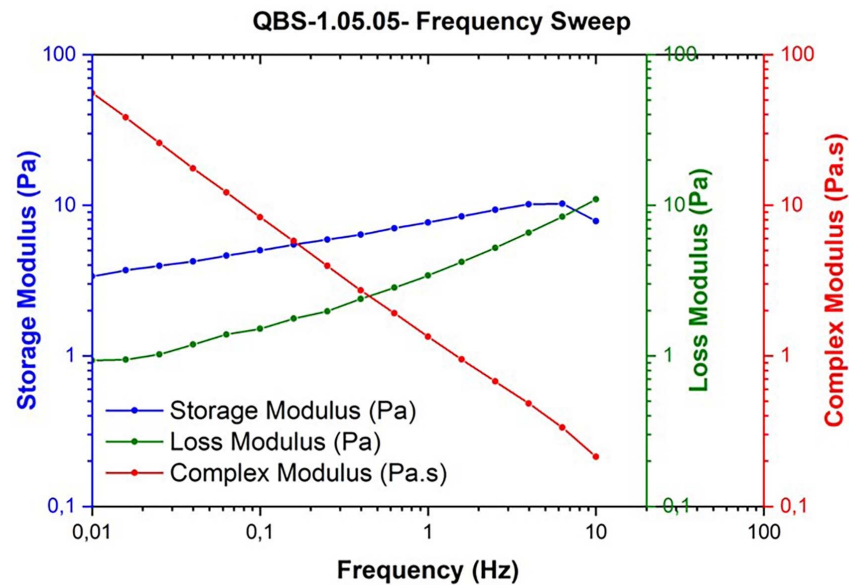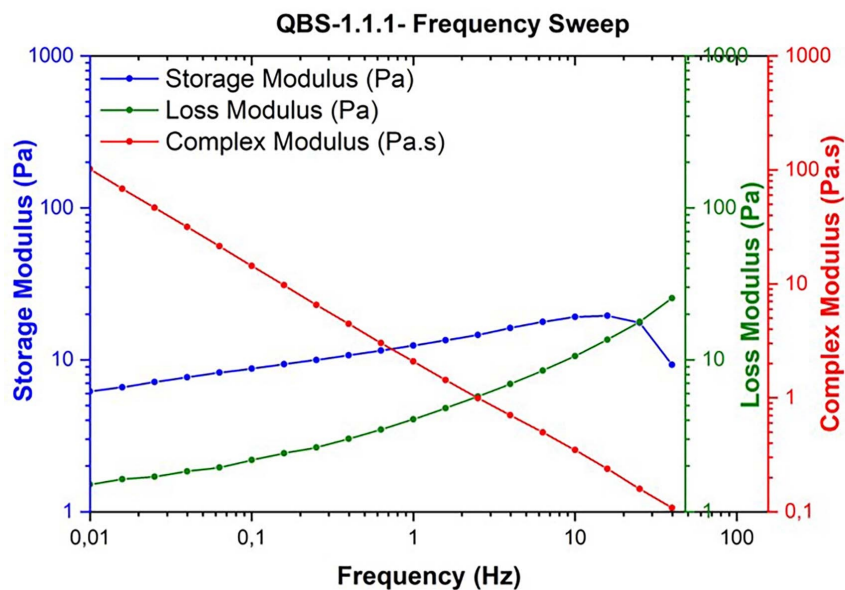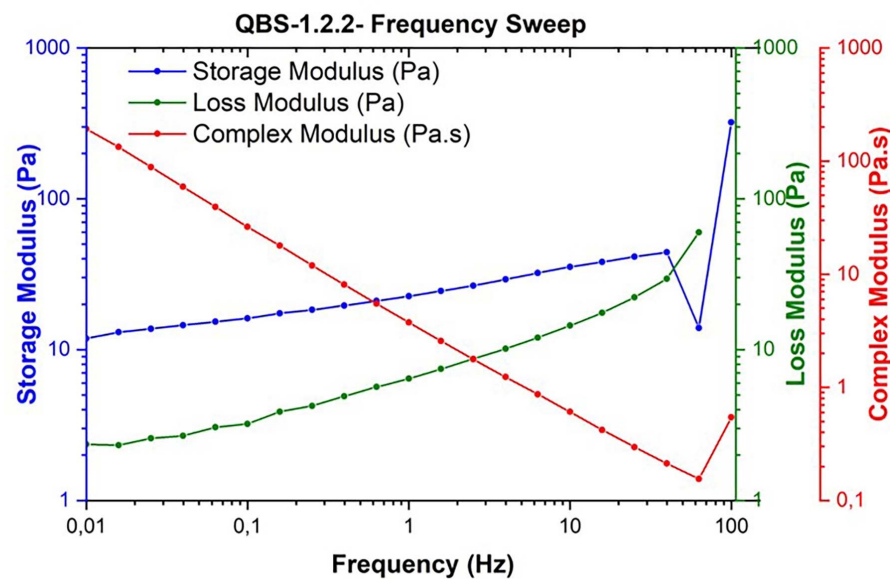

Supplement: d3bm00170a6.pdf [file d3bm00170a6.pdf]
